# Supplementary material for: Effect of a Personalized Diet to Reduce Postprandial Glycemic Response vs a Low-fat Diet on Weight Loss in Adults With Abnormal Glucose Metabolism and Obesity: A Randomized Clinical Trial
Source: PubMed Central journal article supplement (PMC9520362; doi:10.1001/jamanetworkopen.2022.33760), 2022-09-28
Supplement: jamanetwopen-e2233760-s003.pdf [file jamanetwopen-e2233760-s003.pdf]

## Data Sharing Statement

Popp. Effect of a Personalized Diet to Reduce Postprandial Glycemic Response vs a Low-fat Diet on Weight Loss in Adults With Abnormal Glucose Metabolism and Obesity. *JAMA Netw Open*. Published September 28, 2022. doi:10.1001/jamanetworkopen.2022.33760

### Data

**Data available:** Yes

**Data types:** Deidentified participant data, Data dictionary

**How to access data:** Data will be made available upon request to the Principal Investigator ([Mary.Sevick@nyulangone.org](mailto:Mary.Sevick@nyulangone.org))

**When available:** With publication

### Supporting Documents

**Document types:** None

### Additional Information

**Who can access the data:** Anyone requesting the data

**Types of analyses:** For any purpose

**Mechanisms of data availability:** After approval of a proposal by the Principal Investigator
